# 1 Outer membrane vesicles derived from *Klebsiella pneumoniae* are a driving force for 2 horizontal gene transfer

3 Federica Dell'Annunziata<sup>1</sup>, Carmela Dell'Aversana<sup>2,3</sup>, Nunziata Doti<sup>4</sup>, Giuliana Donadio<sup>5</sup>, Fabrizio  
4 Dal Piaz<sup>5</sup>, Viviana Izzo<sup>5</sup>, Anna De Filippis<sup>1</sup>, Marilena Galdiero<sup>1</sup>, Lucia Altucci<sup>3</sup>, Giovanni Boccia<sup>5</sup>,  
5 Massimiliano Galdiero<sup>1</sup>, Veronica Folliero<sup>1\*</sup>, Gianluigi Franci<sup>5\*</sup>

6 1 Department of Experimental Medicine, University of Campania Luigi Vanvitelli, Naples, Italy

7 2 Institute Experimental Endocrinology and Oncology "Gaetano Salvatore" (IEOS) - CNR, Naples, Italy

8 3 Department of Precision Medicine, University of Campania Luigi Vanvitelli, Naples, Italy

9 4 Institute of Biostructures and Bioimaging (IBB), CNR, Naples, Italy.

10 5 Department of Medicine, Surgery and Dentistry Scuola Medica Salernitana, University of Salerno, Salerno, Italy

11 \* For correspondence. E-mail: [gfranci@unisa.it](mailto:gfranci@unisa.it); [veronica.folliero@unicampania.it](mailto:veronica.folliero@unicampania.it)

12

## 13 Abstract

14 Gram-negative bacteria release outer membrane vesicles (OMVs) into the extracellular environment.  
15 Recent studies recognized these vesicles as vectors to horizontal gene transfer, however the parameters  
16 that mediate OMVs transfer within bacterial communities remain unclear. The present study highlights  
17 for the first time the transfer of plasmids containing resistance genes via OMVs derived from *Klebsiella*  
18 *pneumoniae* (*K. pneumoniae*). This mechanism confers DNA protection and it is plasmid copy number  
19 dependent with a ratio of 3.6 time among high copy-number plasmid (pGR) versus low copy number  
20 plasmid (PRM) and the transformation efficiency was 3.6 times greater. Therefore, the DNA amount in  
21 the vesicular lumen and the efficacy of horizontal gene transfer was strictly dependent on the identity  
22 of the plasmid. Moreover, the role of *K. pneumoniae*-OMVs in interspecies transfer was described. The  
23 transfer ability was not related to the phylogenetic characteristics between the donor and the recipient  
24 species. *K. pneumoniae*-OMVs transferred plasmid to *Escherichia coli*, *Salmonella enterica*,  
25 *Pseudomonas aeruginosa* and *Burkholderia cepacia*. These findings address the pivotal role of *K.*  
26 *pneumoniae*-OMVs as vectors for antimicrobial resistance genes spread, contributing to the  
27 development of antibiotic resistance in the microbial communities.

28 **Running Head:** Horizontal gene transfer mediated by *K. pneumoniae*-OMVs

29 **Keywords:** Outer Membrane Vesicles; *Klebsiella pneumoniae*, Horizontal Gene Transfer; Gram-  
30 Negative Bacteria; DNA.

31

32

33

## 34 **Author summary**

35 *K. pneumoniae* is an important opportunistic pathogen that affects several host districts, in particular  
36 respiratory and urinary tracts. Hospital-acquired *K. pneumoniae* infections lead to a 50% mortality rate  
37 correlated with rapid acquisition of antibiotic resistance. Currently, the increasing rate of antibiotic  
38 resistance among *K. pneumoniae* isolates is a major concern worldwide. The spread of multidrug-  
39 resistant *K. pneumoniae* strains renders current therapeutic options ineffective. Like all Gram-negative  
40 bacteria, *K. pneumoniae* secretes OMVs. OMVs are spherical structures, with a diameter between 50-  
41 250 nm, originating from the outer membrane. OMVs biogenesis allows bacteria to interact with the  
42 external environment, increasing bacterial survival under stressful conditions and regulating microbial  
43 interactions within bacterial communities. Few evidence recognized OMVs as vectors for horizontal  
44 gene transfer, contributing to the spread of resistance. In this scenario, the present study examines the  
45 potential role of *K. pneumoniae*-OMVs in inter- and intra-species diffusion of  $\beta$ -lactam resistance.

## 46 **Introduction**

47 Horizontal gene transfer (HGT) represents the main source of genetic material transfer among  
48 microorganisms [1]. Indeed, HGT provides a driving force for bacterial evolution, increasing bacterial  
49 survival, adjustment rate in the harshest environments and pathogenicity [2–4]. Current knowledge of  
50 HGT is based on three widely described mechanisms for the exchange of genetic material between  
51 bacteria: transformation, conjugation and transduction [5–7]. Transformation involves the natural  
52 uptake of naked DNA from an extracellular environment; this phenomenon occurs when cells are in a  
53 physiological state of competence, regulated by 20-50 proteins [8,9]. Conjugation is a DNA transfer  
54 mechanism through the sexual pilus and requires cell-to-cell contact [10]. Conjugative systems are  
55 frequently associated with plasmid transfer [11]. Transduction entails the transfer of DNA between  
56 bacteria through the bacteriophage infections [12]. The recombinant phage particle can contain up to  
57 100 kilobases of DNA and the infection is limited to host specificity [13]. Recently, several studied  
58 reported that HGT processes is facilitated by Outer Membrane Vesicles (OMVs) [14–17].

59 OMVs are spherical nanostructures, 50–250 nm in diameter, released naturally and constitutively by  
60 Gram-negative bacteria during their growth [18]. OMVs originate from the outer membrane (OM) and  
61 include in the vesicular lumen lipopolysaccharide, peptidoglycan, phospholipids, genetic material  
62 (DNA and RNA) and periplasmic and cytoplasmic protein components, during their biogenesis [19].  
63 Although many aspects of vesicular biogenesis and regulation of their composition remain unclear, the  
64 biological functions associated with OMVs release were extensively described [20,21]. These vesicles  
65 play a key role in the bacteria-environment, bacteria-bacteria and bacteria-host interactions [22,23].  
66 OMVs are recognized for their role in nutrient acquisition, response to stress, biofilm formation and

67 toxins release, adhesion and virulence factors and in host defense system evasion [24]. OMVs role in  
68 HGT was reported in *E. coli*, *Acinetobacter baumannii*, *Acinetobacter baylyi*, *Porphyromonas*  
69 *gingivalis*, *P. aeruginosa* and *Thermus thermophilus* [25–28]. Yaron et al. demonstrated the transfer of  
70 virulence genes through *E. coli*-OMVs between bacteria of different species. Moreover, they proved  
71 that the genetic material was protected from digestion with DNase, confirming the packaging in the  
72 vesicular lumen [29]. OMVs derived from *A. baumannii* were also identified as vectors for antibiotic  
73 resistance gene transfer. In the study of Rumbo et al. plasmid-borne bla<sub>OXA-24</sub> gene conferred  
74 carbapenems resistance to sensitive Acinetobacter strains [30]. These evidences highlight the potential  
75 OMVs contribution to the spread of virulence and antibiotic resistance which represents, to date, a  
76 serious risk to human health.

77 In this scenario, *K. pneumoniae* represents one of the most worrying pathogens involved in nosocomial  
78 infections [31]. The constant antibiotics treatment induces selective pressures, causing the evolution of  
79 multidrug-resistant (MDR) bacteria [32]. Our previous studies demonstrated that OMVs derived from  
80 *K. pneumoniae* play a crucial role in the microorganism-host interaction, modulating miRNAs genetic  
81 transcription and influencing the inflammatory response [14,33]. Currently, no study showed the role  
82 of *K. pneumoniae*-OMVs as a carrier for HGT, allowing the transport of genetic material and the spread  
83 of resistance genes. Therefore, this study demonstrates, for the first time, *K. pneumoniae*-OMVs HGT  
84 role. We investigated OMVs contribution in the genetic material cargo and in intra and inter-species  
85 transfer. After, we collected evidence to demonstrate that plasmid copy number (PCN) might play an  
86 important role in the biogenesis, cargo and in the HGT mechanisms. Finally, we verified OMVs stability  
87 over time and whether storage conditions might influence gene transfer.

## 88 **Results**

### 89 **Characterization of isolated *K. pneumoniae*-OMVs**

90 To purify the OMVs derived from *K. pneumoniae*-pGR and *K. pneumoniae*-PRM, bacteria were grown  
91 in LB supplemented with ampicillin up to the late logarithmic-phase of the bacterial growth curve (see  
92 materials and methods for specifications). Vesicles were collected from culture supernatants and  
93 characterized in terms of morphology, size and polydispersity index (PDI). Purified OMVs appeared at  
94 TEM as electron-dense particles, with uniform spherical morphology (figure 1, panel A and B). No  
95 bacterial contaminant was visualized, demonstrating the total sterility of the vesicular suspensions used.  
96 Dynamic light scattering (DLS) analysis showed that OMVs derived from *K. pneumoniae*-pGR  
97 measured a size of  $113.8 \pm 53.7$  nm and were characterized by a slightly heterogeneous size distribution,  
98 represented by the PDI of 0.223 (Figure 1 C). OMVs purified from *K. pneumoniae*-PRM showed a  
99 reduction in size and higher vesicular populations homogeneity, recording a size of  $94.13 \pm 41.10$  nm  
100 and a PDI of 0.191 (Figure 1 D). Purified OMVs were also characterized based on protein profile. The  
101 total vesicular proteins were extracted from *K. pneumoniae*-OMVs via lysis buffer and then quantified

102 by Bradford assay. The protein amount was 35.77 mg and 30.00 mg for *K. pneumoniae*-pGR and *K.*  
103 *pneumoniae*-PRM, respectively, obtained from 600 mL of culture supernatant. Five micrograms of  
104 protein were loaded on 10% SDS-PAGE and the gel was stained with Blue Coomassie (Supplementary  
105 figure 1). The corresponding bands were excised and subjected to in-situ digestion protocols. Peptides  
106 were analyzed by high resolution nanoLC- MS / MS. Mass spectra analysis allowed identifying with  
107 high confidence proteins common to both purified OMVs samples (Supplementary table 1). These  
108 proteins were classified according to the subcellular localization site and biological function (Figures  
109 2, A and B). The vesicles contained 14 membrane-associated proteins (28.57%), 3 periplasmic proteins  
110 (6.12 %) and 32 cytosolic proteins (65.31%). In addition, 3 DNA-binding proteins (6.12%) were  
111 identified among the proteins annotated for their binding function. Twenty-one enzymes were revealed,  
112 including 3 oxidoreductases (14.29%), 2 transferases (9.52%), 1 aminopeptidase (4.76%), 5 lyases  
113 (23.81%), 2 isomerases (9.52%) and 8 ligases (38.10%), (Figure 2 C). To confirm accurate reliability  
114 and reproducibility of data, three independent OMVs purifications were performed and analyzed for  
115 each strain.

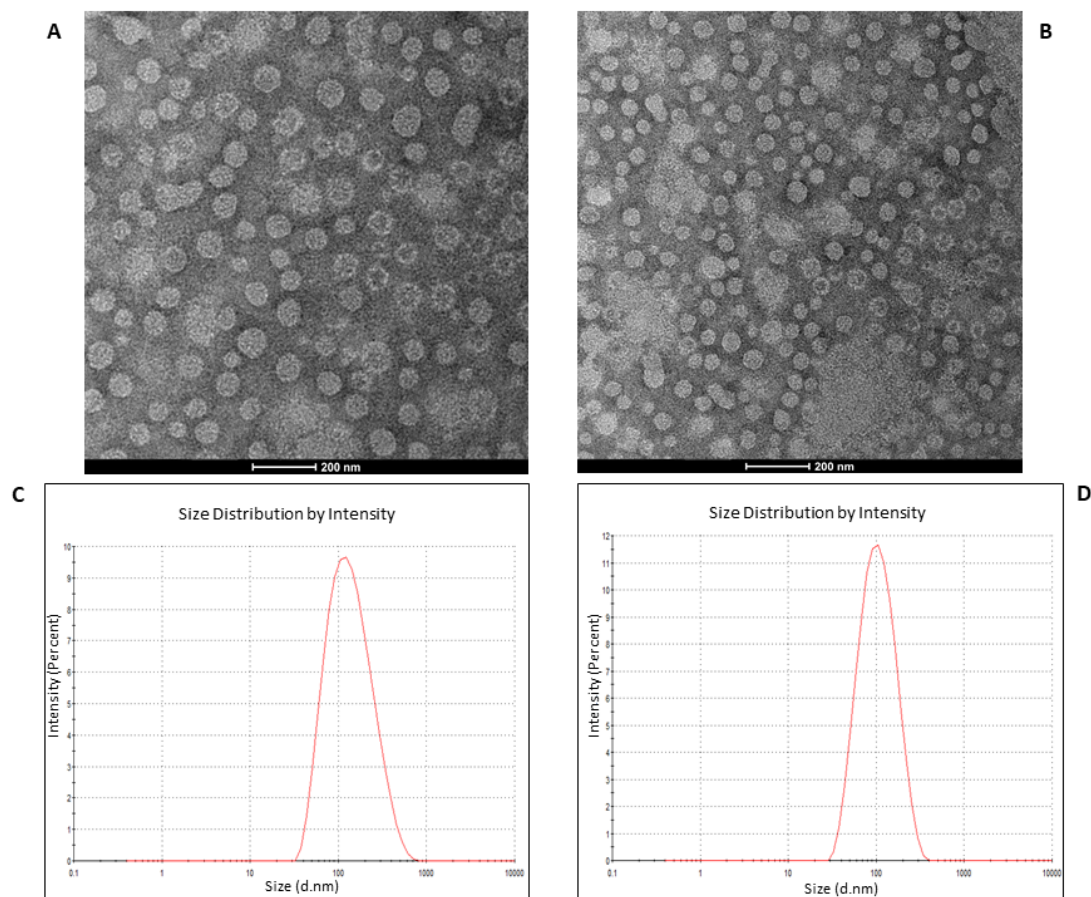

116

117 **Figure 1.** TEM of OMVs purified from *K. pneumoniae*-pGR (A) and *K. pneumoniae*-PRM (B) (scale  
118 bar = 200 nm). DLS intensity-weighted distribution of OMVs derived from *K. pneumoniae*-pGR (C)  
119 and *K. pneumoniae*-PRM (D).

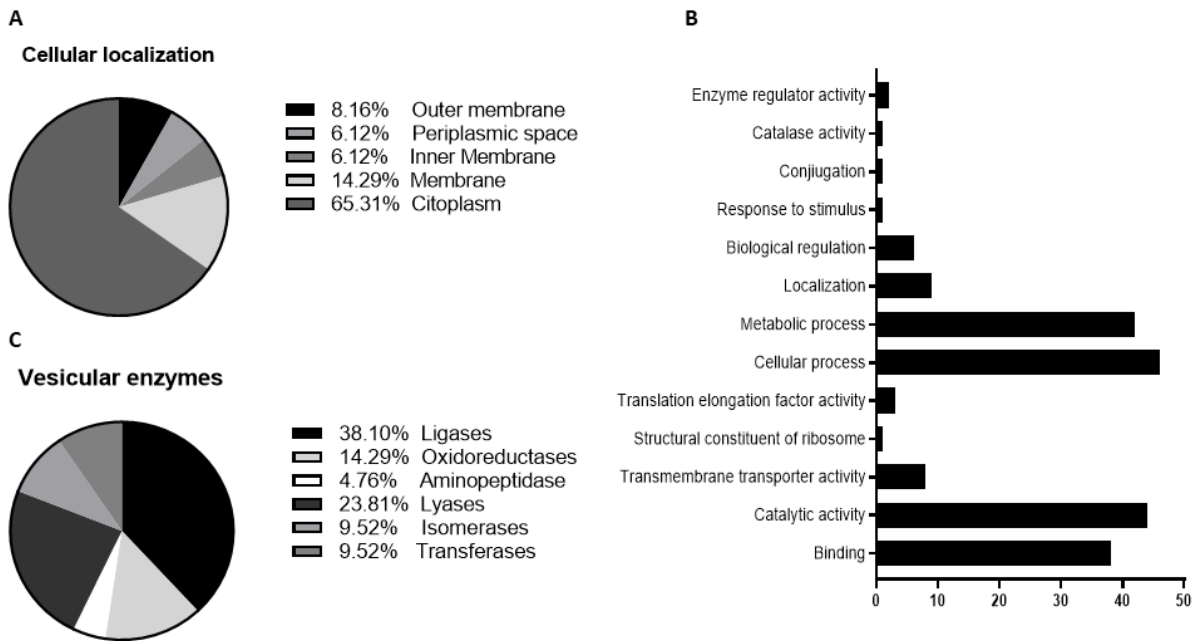

120

121 **Figure 2.** Classification of cellular localization (A), functional annotation (B) and enzymatic classes  
 122 (C) of protein extracted from *K. pneumoniae*-OMVs.

### 123 DNA packaging in *K. pneumoniae* OMVs

124 The propensity of *K. pneumoniae* OMVs to incorporate genetic material during the biogenesis process  
 125 was evaluated by transforming bacteria with pGR and PRM plasmids. *K. pneumoniae*-pGR and *K.*  
 126 *pneumoniae*-PRM were grown on LB supplemented with 100  $\mu\text{g mL}^{-1}$  of ampicillin for selection of  
 127 transformants. Plasmid DNA extraction and enzymatic digestion profile confirmed the plasmids  
 128 presence in the bacterial strains (Supplemental figure 2 A and B). The presence of pGR and PRM  
 129 plasmids in *K. pneumoniae*-OMVs was evaluated by absolute qPCR. To demonstrate that DNA was  
 130 present in the vesicular lumen and protected from the extracellular nucleases action, qPCR was  
 131 performed using OMVs samples either treated or untreated with DNase. In untreated OMVs, plasmid  
 132 concentration was  $18.91 \pm 0.53$  and  $14.78 \pm 0.91$  ng DNA/ $\mu\text{g}$  OMVs, for pGR and PRM, respectively.  
 133 In OMVs treated with DNase before vesicular lysis, pGR recorded a higher loading density, measuring  
 134  $10.4 \pm 0.05$  ng DNA / $\mu\text{g}$  OMVs, which corresponded approximately to  $1.9 \times 10^9$  PCN / $\mu\text{g}$  OMVs.  
 135 Otherwise, PRM measured a plasmid concentration of  $3.08 \pm 0.62$  ng DNA / $\mu\text{g}$  OMVs, corresponding  
 136 to  $9.6 \times 10^8$  PCN / $\mu\text{g}$  OMVs (Figure 3).

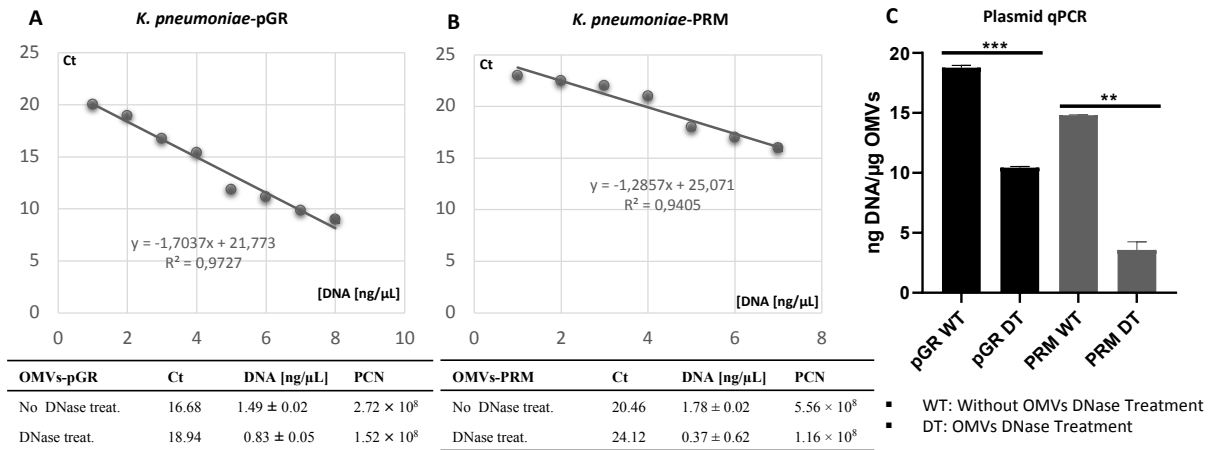

137

138 **Figure 3.** Determination of PCN in OMVs, using quantitative PCR standard curves. The standard  
 139 curves were generated by qPCR of the purified pGR (A) and PRM (B) plasmids. Histogram Graph of  
 140 PGR and PRM cargo efficiency, before and after DNase treatment (C) ( $P$  value < 0.05).

#### 141 OMVs mediate the plasmid intra-specie transfer

142 Transformation experiments were performed by isolating OMVs from *K. pneumoniae*-pGR and *K.*  
 143 *pneumoniae*-PRM. *K. pneumoniae* ATCC recipient cells were incubated with 10 μg of OMVs derived  
 144 from *K. pneumoniae*-pGR and *K. pneumoniae*-PRM. After 24 hours, treated cells were plated on LB-  
 145 ampicillin agar to detect the plasmid resistance marker in the recipient bacteria. OMVs purified from  
 146 *K. pneumoniae*-pGR induced a transformation efficiency of  $2.8 \pm 0.1 \times 10^4$  CFU / μg. HGT mediated  
 147 by *K. pneumoniae*-PRM-OMVs occurred with a transformation efficiency of  $7.8 \pm 0.9 \times 10^3$  CFU / μg.  
 148 In both conditions, no plasmid acquisition occurred when recipient cells were incubated with free  
 149 plasmid (Figure 4 A-H). Therefore, HGT via OMVs derived from *K. pneumoniae*-pGR was 3.6 times  
 150 more efficient than the *K. pneumoniae*-PRM OMVs transfer, with the same vesicular concentration  
 151 (Figure 4 I). Colony-PCR was used to confirm that resistant acquisition. PGR and PRM were  
 152 determined by amplifying a region of the β-lactamase gene and the amplicon was visualized by agarose  
 153 gel electrophoresis (Figure 5 A and B). PCR analysis showed that all grown and selected colonies on  
 154 LB-ampicillin plates contained pGR and PRM plasmids. Pre-transformation colonies of *K. pneumoniae*  
 155 did not show amplification, demonstrating the absence of resistance. Amplification of the 16S ribosomal  
 156 gene region was used as a housekeeping control.

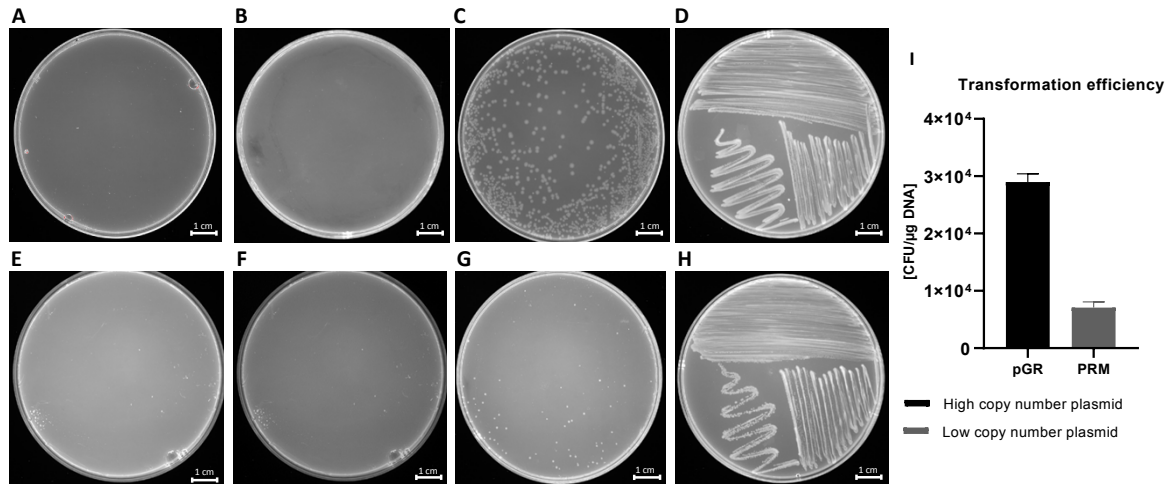

157

158 **Figure 4.** HGT via OMVs derived from *K. pneumoniae*-pGR. Untreated cells (A) and cells treated with  
 159 free plasmid (B) did not record transformants. *K. pneumoniae* ATCC treated with 10 μg of OMVs (C)  
 160 and bacteria control on LB-plates (D). HGT-OMVs from *K. pneumoniae*-PRM. Transformation in  
 161 untreated (E) and treated with free plasmid (F) bacteria did not occurred. *K. pneumoniae* ATCC  
 162 incubated with 10 μg of OMVs (G) and bacteria control on LB-plates (H). Intra-species HGT efficiency  
 163 via OMVs purified from *K. pneumoniae*-pGR and *K. pneumoniae*-PRM.

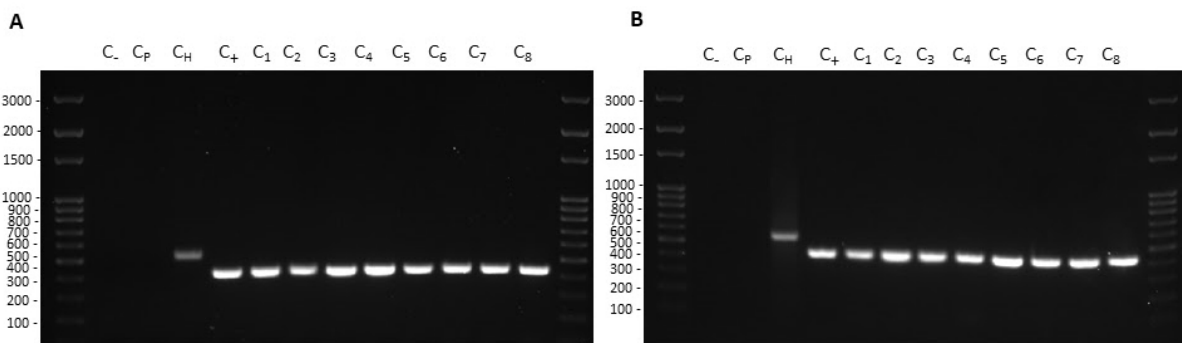

164

165 **Figure 5.** Colony-PCR from recipient cells treated with *K. pneumoniae* pGR (A) and *K. pneumoniae*  
 166 PRM (B) OMVs. DNA gel showed PCR products with expected lengths: β-lactamase product~ 424 bp  
 167 (C<sub>1-8</sub>), ribosomal 16S product ~ 550bp (C<sub>H</sub>). Control water (C.) and untreated bacteria (C<sub>P</sub>) did not show  
 168 amplification.

### 169 **OMVs induce the generalized resistance spread**

170 The OMVs potential to transfer genetic material between different microbial species was evaluated.  
 171 Five recipient bacterial species were selected based on taxonomic differences (Figure 6A). Cultures of  
 172 *K. pneumoniae*, *E. coli*, *S. enterica*, *P. aeruginosa* and *B. cepacia* were treated with *K. pneumoniae*-  
 173 pGR OMVs. After 24 hours of incubation, recipient cells were plated on LB-ampicillin agar plates and  
 174 counted to define the transformation efficiency. OMVs derived from *K. pneumoniae*-pGR transferred

175 plasmid DNA with a transformation efficiency of  $2.8 \pm 0.1 \times 10^4$ ,  $1.7 \pm 0.2 \times 10^4$ ,  $1.5 \pm 0.9 \times 10^4$ ,  $1.6 \pm$   
176  $0.1 \times 10^4$ ,  $1.8 \pm 0.8 \times 10^4$  CFU /  $\mu$ g for *K. pneumoniae*, *E. coli*, *S. enterica*, *P. aeruginosa* and *B. cepacia*,  
177 respectively (Figure 6 B). Colonies of each recipient bacterial species were selected and subjected to  
178 PCR analysis to confirm the presence of the  $\beta$ -lactamase gene in the recipient species (Supplementary  
179 figure 3 A, B, C and D). Recipient cells incubated with free plasmid pGR and untreated cells did not  
180 acquire antibiotic resistance in any condition.

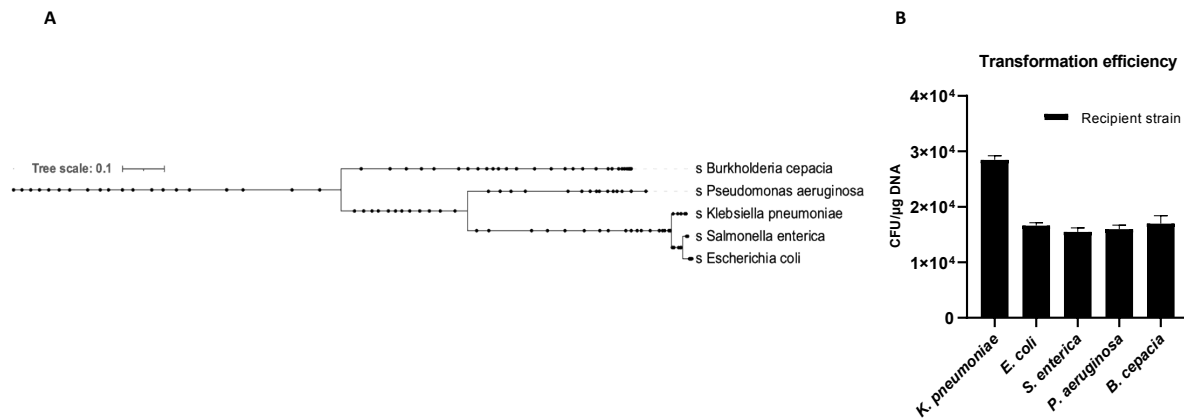

181

182 **Figure 6.** Phylogenetic relationship of the recipient species (A). *K. pneumoniae*-pGR OMVs inter-  
183 species transformation efficiency (B).

#### 184 **OMVs stability over time**

185 OMV-HGT experiments continued to evaluate transformation efficiency over time, by storing OMVs  
186 derived from *K. pneumoniae*-pGR at  $-20^\circ \text{C}$  for 30 days and at  $+4^\circ \text{C}$  for 7 days. A gradual reduction  
187 in transformation efficiency was observed using OMVs treated with DNase and stored at  $-20^\circ \text{C}$  and  
188  $+4^\circ \text{C}$  for increasing periods of time. The HGT experiment was conducted using *K. pneumoniae* ATCC  
189 as a recipient cell. The maximum number of transformants was obtained with OMVs used after 10 days of  
190 storage, showing an efficiency of  $2.5 \pm 0.1 \times 10^4$  CFU /  $\mu$ g. After 20 days, a reduction in efficiency was  
191 verified, recording  $7.7 \pm 0.9 \times 10^3$  CFU /  $\mu$ g. On the 30th day of storage, a drastic decrease of  
192 transformants had occurred, registering  $9.1 \pm 0.12 \times 10^2$  CFU /  $\mu$ g. The OMVs stability at  $4^\circ \text{C}$  showed  
193 a slight reduction over time. The recorded transformation efficiency was  $1.7 \pm 0.25 \times 10^4$  and  $8.0 \pm 0.43$   
194  $\times 10^3$  CFU /  $\mu$ g, after 3 and 7 days of storage, respectively (Figure 7).



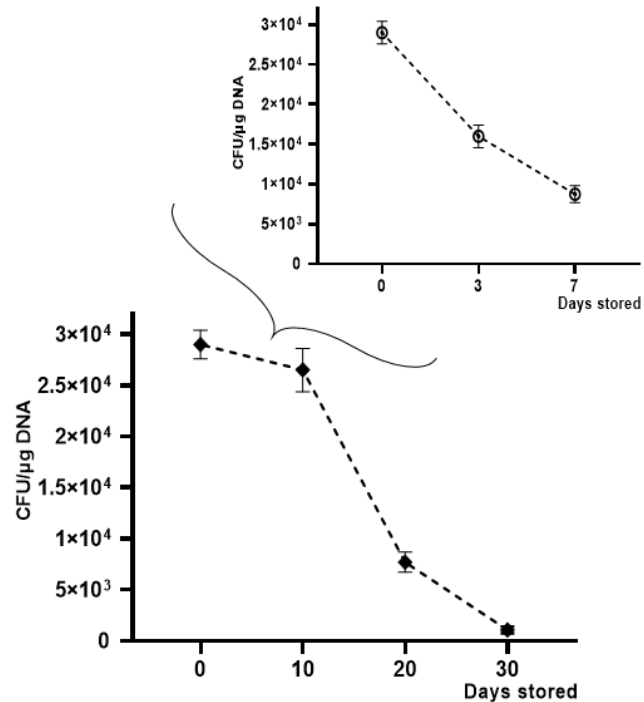

195

196 **Figure 7.** Transformation frequency of *K. pneumoniae*-pGR OMVs storage at -20 °C and +4°C for 30  
197 and 7 days, respectively.

#### 198 **Diagnostic transformed strains characterization**

199 The phenotypic effect correlate to the genotypic resistance detected by PCR analysis was evaluated  
200 through antibiotic susceptibility testing. Each bacterial strain, before and after treatment with OMVs  
201 derived from *K. pneumoniae* pGR, was examined. Concerning the susceptibility to β-lactams, the  
202 inhibition diameter measured before OMVs treatment were  $14.5 \pm 0.3$ ,  $14 \pm 0.01$ ,  $18.3 \pm 0.07$ ,  $25 \pm 0.5$ ,  
203  $20 \pm 0.9$  mm for *K. pneumoniae*, *E. coli*, *S. enterica*, *P. aeruginosa* and *B. cepacia* respectively.  
204 Inhibition zones recorded were associated with susceptible strains, in accordance with EUCAST  
205 guidelines. After the OMV-HGT, no inhibition area was identified for β-lactam antibiotics,  
206 demonstrating the acquisition of resistance. The inhibition area measured for ciprofloxacin was  $\geq 30$   
207 mm, before and after OMVs treatment, in each bacterial species (Figure 8). The ciprofloxacin control  
208 was used to demonstrate that the acquired resistance was associated with the plasmid containing β-  
209 lactamase gene.

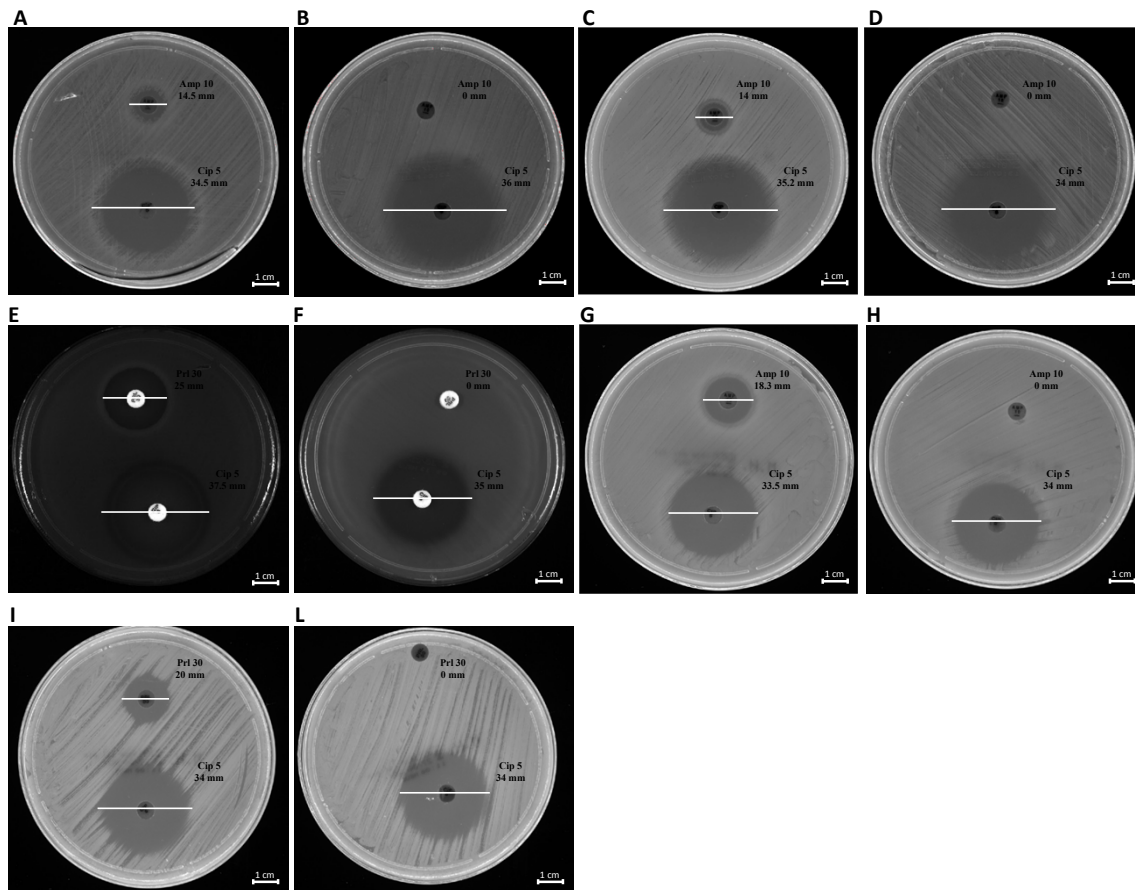

210

211 **Figure 8.** Antibiotic susceptibility of bacteria to  $\beta$ -lactams. *K. pneumoniae* pre and post-OMVs  
212 treatment (A, B); *E. coli* pre and post-OMVs treatment (C, D); *P. aeruginosa* pre and post-OMVs  
213 treatment (E,F); *S. enterica* pre and post-OMVs treatment (G, H); *B. cepacia* pre and post-OMVs  
214 treatment (I, L).

## 215 Discussion

216 Horizontal gene transfer plays an important role in promoting bacterial evolution, adaptation to  
217 environmental changes and acquisition of new metabolic capabilities [3]. Genetic pool modifications  
218 as a consequence of genetic transfer were observed in bacterial communities with high frequency rates,  
219 demonstrating the importance of this phenomenon for bacterial survival [34]. Currently, transformation,  
220 transduction and conjugation are considered the three canonical HGT mechanisms, contributing  
221 significantly to genetic diversity [35]. However, novel genetic material exchange events are under  
222 consideration and may be added to those currently known. Nowadays, the HGT mechanism should  
223 include the OMVs secretion by Gram-negative [36]. Previous studies reported that OMVs incorporated  
224 DNA into the lumen and transported it to recipient cells [37]. Currently, no studies assessed the ability  
225 of *K. pneumoniae* to exploit HGT via OMVs to spread antimicrobial resistance. However, multidrug-  
226 resistant *K. pneumoniae* is increasingly implicated in hospital-acquired infections, causing high  
227 morbidity and mortality. Improved understanding of *K. pneumoniae* mechanisms to resistance-genes

228 spread is needed. Therefore, the focus of this research was the preliminary characterization of HGT  
229 mechanisms mediated by OMVs derived from *K. pneumoniae*.

230 Firstly, OMVs were isolated from *K. pneumoniae*-pGR and *K. pneumoniae*-PRM, respectively. TEM  
231 and DLS analysis revealed that the vesicles featured a spherical morphology, in accordance with our  
232 previously published data, but with a reduced diameter compared with the OMVs collected from *K.*  
233 *pneumoniae* ATCC [14]. The different vesicular size could be attributed to the antibiotic presence  
234 during bacterial growth. Indeed, Fulsundar et al. showed that antibiotic and environmental stresses  
235 determined a significant effect on the OMVs production, size and DNA content [17]. These evidences  
236 confirm that OMVs release is a physiologically controlled process, dependent on environmental factors.  
237 The proteomic characterization of OMVs derived from *K. pneumoniae*-pGR and *K. pneumoniae*-PRM  
238 identified more than 55 proteins, mainly from the outer membrane and the periplasmic space. Inner  
239 membrane and cytosolic proteins were also detected, demonstrating that, although the mechanism of  
240 inclusion is unclear, cytoplasmic components and portions of membrane were incorporated into OMVs  
241 during the biogenesis process. Finally, the presence of proteins capable of interacting with DNA could  
242 confirm the ability of OMVs to also incorporate genetic material. These results may suggest, in addition  
243 to the OMVs originating from outer membrane budding, the possible existence of another vesiculation  
244 pattern. Indeed, Cruz et al. showed in *S. vesiculosa* M7T, *N. gonorrhoeae*, *P. aeruginosa* PAO1  
245 e *A. baumannii* AB41 the presence of vesicles containing a bilayer of membrane and highly  
246 electrodense cytoplasmic material. These vesicles were classified as outer-inner membrane vesicles (O-  
247 IMVs) [38]. The possible secretion of two vesicle types, OMVs and O-IMVs, could explain how DNA  
248 is incorporated in OMVs, since is not properly clarified. Currently, three models were proposed: i) the  
249 DNA present in the extracellular environment was internalized according with a mechanism similar to  
250 bacterial transformation; ii) DNA was transported through the inner membrane and the cell wall up to  
251 the periplasmic space, where it was included in the OMVs; iii) the DNA inclusion in the vesicles  
252 occurred through the secretion of O-IMV, which incorporate cytoplasmic components and DNA. The  
253 third model is the most accredited and supported by experimental evidence [20]. Although the DNA  
254 inclusion mechanism is not known with absolute certainty, our finding demonstrated that OMVs  
255 secreted by *K. pneumoniae* were involved in HGT, allowing the spread of resistance genes in microbial  
256 communities.

257 Contextually, our manuscript demonstrated that *K. pneumoniae* transferred genetic material,  
258 incorporating DNA within the OMVs and protecting it from the extracellular exonucleases action. The  
259 DNA in the vesicular lumen was transferred to the recipient cell by determining the acquisition of  
260 resistance genes present in the plasmid. The recipient cell *K. pneumoniae*, after contact with OMVs,  
261 acquired and expressed resistance to ampicillin, proving the OMVs ability to promote intraspecies HGT.  
262 Plasmid transfer did not occur when cells were incubated with free plasmid, suggesting that vesicles  
263 could represent a physiological mechanism that exceeds environmental limits (exonuclease

264 degradation, dilution of gene material, long-distance transfer, etc.) and associated with the donor /  
265 recipient cell (state of competence, high vesicle-OM affinity, correlation phylogenetics, etc.).  
266 Moreover, the transfer efficiency over time of the stored OMVs was evaluated. The transfer rates  
267 remained unchanged for up to 10 days. Thereafter, the number of transformants gradually decreased for  
268 up to 30 days. Similar trends were shown in the study conducted by Chatterjee et al. on OMVs derived  
269 from *A. baumannii*, confirming the long-lasting stability without cryopreservatives [26]. Subsequently,  
270 it was investigated whether plasmid identity affected incorporation and transfer rate. The transfer of  
271 two different plasmids via *K. pneumoniae*-OMVs was examined, showing that the plasmid type induced  
272 changes in packaging and transformation rate. The high copy number plasmid (pGR) was loaded and  
273 transferred with greater efficiency compared to the low copy number plasmid (PRM). Our results were  
274 in line with a study conducted by Tran and Boedicker, in which the low copy number plasmid  
275 (pZS2501) had a low loading capacity ( $0.49 \times 10^3$  copies per pg of OMVs), while the high-copy number  
276 plasmids (pLC291 and pUC19) showed a high loading potential ( $2.58 \times 10^3$  and  $482.7 \times 10^3$  copies per  
277 pg of OMVs) [16]. Therefore, the plasmid cargo in the OMVs was strictly dependent on the copy  
278 number: the higher the PCN, the greater the plasmid amount in the OMVs and consequently the  
279 transformation efficiency. OMVs-mediated transfer exceeds the limits observed in other HGT-  
280 mechanisms [39]. Chatterjee et al. have already reported the ability of *A. baumannii*-OMVs to allow  
281 interspecies gene transfer [26]. For this reason, interspecies gene exchange was observed via *K.*  
282 *pneumoniae*-OMVs, using 4 different recipient species: *E. coli*, *S. enterica*, *P. aeruginosa* and *B.*  
283 *cepacia*. The generalized transfer to the different bacterial genera highlighted the HGT-OMVs  
284 efficiency, which verified independently of the phylogenetic correlation between the donor and  
285 recipient cell. Our experimental evidence showed that OMVs contributed to genetic exchange in  
286 microbial communities even among distantly related bacteria, without specific exchange mechanisms.  
287 Future studies will examine the possibility of OMVs to exchange DNA between different Gram-positive  
288 species.

289 In summary, the present study demonstrates, for the first time, the resistance gene to  $\beta$ -lactams spreads  
290 through OMVs secreted by *K. pneumoniae*. This innovative HGT mechanism allows for intra-species  
291 or inter-species diffusion, persistent over time and apparently not associated with specific limitations.  
292 Our future objectives will be studies aimed at blocking vesicular biogenesis, particularly of multidrug-  
293 resistant strains, to limit the spread of antibiotic resistance.

## 294 **Materials and Methods**

### 295 **Bacterial Strains, plasmids and growing conditions**

296 The strains used in this study were obtained from the American Type Culture Collection (ATCC)  
297 (Manassas, USA). *K. pneumoniae* ATCC 10031 was used for the OMVs purification. *K. pneumoniae*  
298 was transformed using the calcium chloride method with pGR (*K. pneumoniae*-pGR) (Addgene,

299 Massachusetts, USA) and PRM-GFP (*K. pneumoniae*-PRM) (Addgene, Massachusetts, USA)  
300 respectively [40,41]. The first one was a high copy number plasmid (500 ~ 600 copies) containing genes  
301 for green fluorescent protein (GFP) and  $\beta$ -lactamase which conferred resistance to ampicillin. PRM was  
302 a plasmid containing the same genes and differed in copy number (10 ~ 12 copies). After transformation,  
303 *K. pneumoniae*-pGR and *K. pneumoniae*-PRM were cultured on Luria-Bertani agar (LB) (Sigma-  
304 Aldrich, St. Louis, USA) containing 100  $\mu\text{g mL}^{-1}$  of ampicillin (Sigma-Aldrich, St. Louis, USA). *E.*  
305 *coli* ATCC 25922, *S. enterica* ATCC 14028, *P. aeruginosa* ATCC 13388 and *Burkholderia cepacia*  
306 ATCC 25416 were used as recipient strains for the HGT mediated by OMVs. All bacterial strains were  
307 cultured in LB (Sigma-Aldrich, St. Louis, USA) medium at 37 °C under orbital shaking at 180 rpm.

### 308 **OMVs Purification**

309 OMVs were isolated from liquid cultures of *K. pneumoniae*-pGR and *K. pneumoniae*-PRM-GFP as  
310 previously described with modifications [42]. Ten milliliters of overnight (O/N) bacterial culture were  
311 inoculated in 600 mL of LB containing 100  $\mu\text{g mL}^{-1}$  ampicillin. The bacterial inoculum was cultured at  
312 37 °C under orbital shaking (180 rpm) for 8-12 hours, up to the OD<sub>600</sub> nm value of 1. The cultures were  
313 centrifuged at 4000  $\times$  g at 4 °C for 20 min, to remove bacterial cells. Supernatants were decanted and  
314 filtered using vacuum Stericup™ 0.45  $\mu\text{m}$  and 0.22  $\mu\text{m}$  pore size polyethersulfone (PES) top filter  
315 (Millipore, Massachusetts, USA), to deflect remaining bacteria and cell debris. Vesicles were collected  
316 from cell-free supernatant culture by ultracentrifugation at 100000  $\times$  g (centrifuge Optima XPN-100  
317 Beckman Coulter and rotor SW28) at 4 °C for 1.5 hours. Pellets were washed in sterile phosphate  
318 buffered saline 1X (PBS) by ultracentrifugation (100.000  $\times$  g at 4 °C for 1.5 hours). Vesicular pellets  
319 were suspended in 250  $\mu\text{L}$  of PBS 1X and OMVs sterility was checked by inoculating 10  $\mu\text{L}$  of vesicles  
320 on LB agar plates. OMV samples were treated with DNase (Applied Biological Materials – abm, British  
321 Columbia, Canada) according to the manufacturer's protocol and stored at -20 °C until use.

### 322 **Transmission electron microscopy (TEM)**

323 Purified OMVs were visualized by TEM, using negative staining. Five microliters of sample were  
324 adsorbed on carbon-coated copper/palladium grids for 30 min. A drop of sterile deionized water was  
325 used to wash the grids and a negative staining was realized by addition of 5  $\mu\text{L}$  of 1% (w / v) uranyl  
326 acetate. TEM images were acquired using an EM 208 S transmission electron microscope (Philips,  
327 Amsterdam, Netherlands).

### 328 **OMVs size characterization by Dynamic Light Scattering (DLS)**

329 Vesicles diameter size (Z-ave) and PDI analysis were performed using Zetasizer Nano-ZS (Malvern  
330 Instruments, Worcestershire, UK). For DLS, 40  $\mu\text{L}$  of OMVs aliquot were mixed gently and transferred  
331 to sterile cuvettes. All measurements were conducted at 25 °C and three independent experiments for

332 each purification were performed. DLS data were processed using Zetasizer software (V 7.11) provided  
333 by Malvern Panalytical (Malvern, UK).

### 334 **OMVs protein profile by tandem mass spectrometry (MS/MS)**

335 For protein profile, OMVs were incubated with 1% Triton X-100 for 1 h at 4 °C. Lysed vesicles were  
336 centrifuged at  $14.000 \times g$  at 4 °C for 30 min and the supernatant was examined for protein amount by  
337 Bradford assay (HIMEDIA, Maharashtra, India). The protein extract was subjected to 10% sodium  
338 dodecyl sulfate polyacrylamide gel electrophoresis (SDS-PAGE). The gel was stained with Coomassie  
339 Brilliant blue G250 (Sigma-Aldrich St. Louis, USA) and different bands were cut to perform MS and  
340 MS / MS analysis, as previously described [14]. Briefly, protein bands were extracted from the gel and  
341 digested with trypsin. NanoUPLC-hr MS / MS analysis of the resulting peptide mixtures were  
342 performed on a Q-Exactive orbitrap mass spectrometer (Thermo Fisher Scientific, USA), coupled with  
343 a nanoUltimate300 UHPLC system (Thermo Fisher Scientific, USA). For protein identification, mass  
344 spectra were subjected to analysis by Mascot software (v2.5, Matrix Science, Boston, MA, USA), using  
345 the non-database redundant UniprotKB / Swiss-Prot (version 2020\_03). The identified proteins were  
346 analyzed by subcellular localization, biological processes and molecular functions using Uniprot  
347 software (<https://www.uniprot.org/>).

### 348 **Intra-vesicular DNA analysis**

349 Plasmid concentration in OMVs was determined by Real-time PCR (qPCR) using BrightGreen qPCR  
350 MasterMix Kits (abm, British Columbia, Canada), according to the manufacturer's instructions. For  
351 DNA extraction, vesicles were lysed by boiling at 100 °C for 10 minutes. Two microliters of OMVs  
352 were added to 0.2 μM of primer, 1X mastermix in a final reaction volume of 20 μL. Primers used for  
353 qPCR were: β-lactamase Fw 5'- AACTTTATCCGCCTCCATCC-3', β-lactamase Rev 3'-  
354 GCTATGTGGCGCGGTATTAT-5'. The amplification was performed in CFX96 Touch Real-Time  
355 PCR Detection System (Bio-Rad, California, USA), using the following amplification program:  
356 denaturation at 95 °C for 15 second, annealing at 60 °C for 20 second and extension at 72 °C for 15  
357 second (40 cycles). The standard curves were constructed using purified plasmids from *K. pneumoniae*-  
358 pGR and *K. pneumoniae*-PRM respectively. Plasmid concentration in OMVs was converted in plasmid  
359 copy number (PCN), according to the formula:

$$360 \quad PCN = \frac{ng \text{ DNA} \times 6.022 \times 10^{23}}{length \times 1 \times 10^9 \times 650}$$

361 (<http://cels.uri.edu/gsc/cndna.html>). Subsequently, plasmid loading was estimated based on OMVs  
362 protein concentrations.

### 363 **OMVs mediated gene transfer**

364 For gene transfer experiments through OMVs, the recipient strains *K. pneumoniae* ATCC, *E. coli*  
365 ATCC, *P. aeruginosa* ATCC, *B. cepacia* ATCC and *S. enterica* ATCC were inoculated in LB-broth up  
366 to OD<sub>600</sub> nm value of 0.4. Cells were diluted in cold LB at final concentration of 10<sup>7</sup> CFU / mL. Bacterial  
367 suspensions (60 µL) were incubated with 10 µg of OMVs statically for 4 hours at 37 °C and  
368 subsequently, for 4 hours under orbital shaking (180 rpm) at 37 °C. Fresh LB medium was added to  
369 each bacterial suspension and then incubated O/N under orbital shaking (180 rpm) at 37 °C. To further  
370 confirm that the plasmid transfer was mediated by OMVs, two separate experiments were performed  
371 with: (i) free plasmid and (ii) untreated cells. The following day, a 100 µL aliquot of bacteria was plated  
372 on LB-agar supplemented with 100 µg mL<sup>-1</sup> ampicillin and incubated O/N at 37°C. The bacterial  
373 colonies (C<sub>1-8</sub>) were counted to define the transformation efficiency, according to the formula:

374 Transformation efficiency [CFU / µg] = 
$$\frac{\text{Number of colonies} \times \text{Dilution factor}}{\text{DNA quantity}}$$

375 The same transformation experiments were performed using OMVs stored at -20 °C for 10, 20 and 30  
376 days and OMVs stored at +4°C for 3 and 7 days.

### 377 **Polymerase Chain Reaction (PCR) screening**

378 After OMVs gene transfer, bacterial colonies grown on LB-agar supplemented with 100 µg mL<sup>-1</sup>  
379 ampicillin were selected and subjected to molecular investigation for the presence of the plasmid by  
380 colony-PCR. Each bacterial colony was lysed by heat-shock and then centrifuged at 16.000 × g at 4°C  
381 for 10 min. The supernatant was transferred to a new Eppendorf and the DNA concentration was  
382 examined by NanoDrop 1000 spectrophotometer (Thermo Fisher Scientific, Massachusetts, USA). PCR  
383 were performed in a total volume of 50 µL containing 1 µM each primer, 1X Taq Master Mix (abm,  
384 British Columbia, Canada) and 100 ng of DNA. The primers used to amplify the 424 bp region of β-  
385 lactamase gene were Fw 5'- AACTTTATCCGCCTCCATCC-3', Rev 3'-  
386 GCTATGTGGCGCGGTATTAT-5'. The amplification was conducted in Thermal cycler UNO96  
387 (VWR International, Pennsylvania, USA) according to the following program: initial denaturation at  
388 94°C for 3 min, 35 cycles of amplification in which each cycle was denatured at 94 °C for 30 second,  
389 annealed at 57.3 °C for 30 second and extended at 72 °C 1 min; the final extension at 72 °C for 5 min.  
390 As a housekeeping gene control, 16S rRNA gene was amplified, using the primers: Fw 5'-  
391 GGTAGAGTTTGATCCTGGCTCAG-3', Rev 3'- ATTACCGCGGCTGCTGG-5'. The used program  
392 was: initial denaturation at 94°C for 1 min, 30 cycles of amplification in which each cycle was denatured  
393 at 94 °C for 1 min, annealed at 58 °C for 1 min and extended at 72 °C 1.5 min; the final extension at 72  
394 °C for 10 min. To visualize the amplification product, 1% agarose gel electrophoresis was performed.

### 395 **Antibiotic susceptibility test**

396 The disk diffusion assay was performed according to the National Committee on Clinical Laboratory  
397 Standards (NCCLS) [43]. Fresh colonies, before and after OMVs treatment, were inoculated in

398 physiological solutions to 0.5 McFarland turbidity. With cotton swab dipped in the bacterial inoculum,  
399 the solution was homogeneously plated into Mueller-Hinton (MH) agar plates. Disks of ampicillin (10  
400 µg) (Thermo Fisher Scientific, Massachusetts, USA), piperacillin (30 µg) (Thermo Fisher Scientific,  
401 Massachusetts, USA) and ciprofloxacin (5 µg) (Thermo Fisher Scientific, Massachusetts, USA) were  
402 placed on the plates and were incubated at 37 °C O/N. The antibiotic susceptibility was examined by  
403 measuring the zone of inhibition diameter, according to the European Committee on Antimicrobial  
404 Susceptibility Testing (EUCAST) guidelines.

405

#### 406 **Author Contributions**

407 Conceptualization: Federica Dell'Annunziata

408 Data curation: Veronica Folliero, Anna De Filippis

409 Formal analysis: Giuliana Donadio, Nunzianna Doti

410 Funding acquisition: Giovanni Boccia

411 Investigation: Carmela Dell'Aversana

412 Project administration: Massimiliano Galdiero

413 Supervision: Gianluigi Franci

414 Validation: Viviana Izzo

415 Writing – original draft: Marilena Galdiero, Lucia Altucci

416 Writing – review & editing: Fabrizio Dal Piaz

#### 417 **References**

418 1. Bedhomme S, Amorós-Moya D, Valero LM, Bonifaci N, Pujana M-À, Bravo IG. Evolutionary  
419 Changes after Translational Challenges Imposed by Horizontal Gene Transfer. *Genome Biol Evol.*  
420 2019;11: 814–831. doi:10.1093/gbe/evz031

421 2. Bello-López JM, Cabrero-Martínez OA, Ibáñez-Cervantes G, Hernández-Cortez C, Pelcastre-  
422 Rodríguez LI, Gonzalez-Avila LU, et al. Horizontal Gene Transfer and Its Association with Antibiotic  
423 Resistance in the Genus *Aeromonas* spp. *Microorganisms.* 2019;7.  
424 doi:10.3390/microorganisms7090363

425 3. Emamalipour M, Seidi K, Zununi Vahed S, Jahanban-Esfahlan A, Jaymand M, Majdi H, et al.  
426 Horizontal Gene Transfer: From Evolutionary Flexibility to Disease Progression. *Front Cell Dev Biol.*  
427 2020;8: 229. doi:10.3389/fcell.2020.00229

428 4. Davies J, Davies D. Origins and evolution of antibiotic resistance. *Microbiol Mol Biol Rev.*



- 429 2010;74: 417–433. doi:10.1128/MMBR.00016-10
- 430 5. Hall RJ, Whelan FJ, McInerney JO, Ou Y, Domingo-Sananes MR. Horizontal Gene Transfer  
431 as a Source of Conflict and Cooperation in Prokaryotes. *Front Microbiol.* 2020;11: 1569.  
432 doi:10.3389/fmicb.2020.01569
- 433 6. Ely B. Recombination and gene loss occur simultaneously during bacterial horizontal gene  
434 transfer. *PLoS One.* 2020;15: e0227987. doi:10.1371/journal.pone.0227987
- 435 7. Redondo-Salvo S, Fernández-López R, Ruiz R, Vielva L, de Toro M, Rocha EPC, et al.  
436 Pathways for horizontal gene transfer in bacteria revealed by a global map of their plasmids. *Nat*  
437 *Commun.* 2020;11: 3602. doi:10.1038/s41467-020-17278-2
- 438 8. Riva F, Riva V, Eckert EM, Colinas N, Di Cesare A, Borin S, et al. An Environmental  
439 *Escherichia coli* Strain Is Naturally Competent to Acquire Exogenous DNA. *Front Microbiol.* 2020;11:  
440 574301. doi:10.3389/fmicb.2020.574301
- 441 9. Salvadori G, Junges R, Morrison DA, Petersen FC. Competence in *Streptococcus pneumoniae*  
442 and Close Commensal Relatives: Mechanisms and Implications. *Front Cell Infect Microbiol.* 2019;9:  
443 94. doi:10.3389/fcimb.2019.00094
- 444 10. Headd B, Bradford SA. The Conjugation Window in an *Escherichia coli* K-12 Strain with an  
445 IncFII Plasmid. *Appl Environ Microbiol.* 2020;86. doi:10.1128/AEM.00948-20
- 446 11. Grohmann E, Muth G, Espinosa M. Conjugative plasmid transfer in gram-positive bacteria.  
447 *Microbiol Mol Biol Rev.* 2003;67: 277–301, table of contents. doi:10.1128/MMBR.67.2.277-301.2003
- 448 12. Fillol-Salom A, Alsaadi A, Sousa JAM de, Zhong L, Foster KR, Rocha EPC, et al.  
449 Bacteriophages benefit from generalized transduction. *PLoS Pathog.* 2019;15: e1007888.  
450 doi:10.1371/journal.ppat.1007888
- 451 13. Gómez-Gómez C, Blanco-Picazo P, Brown-Jaque M, Quirós P, Rodríguez-Rubio L, Cerdà-  
452 Cuellar M, et al. Infectious phage particles packaging antibiotic resistance genes found in meat products  
453 and chicken feces. *Sci Rep.* 2019;9: 13281. doi:10.1038/s41598-019-49898-0
- 454 14. Dell'Annunziata F, Ilisso CP, Dell'Aversana C, Greco G, Coppola A, Martora F, et al. Outer  
455 Membrane Vesicles Derived from *Klebsiella pneumoniae* Influence the miRNA Expression Profile in  
456 Human Bronchial Epithelial BEAS-2B Cells. *Microorganisms.* 2020;8.  
457 doi:10.3390/microorganisms8121985
- 458 15. Domingues S, Nielsen KM. Membrane vesicles and horizontal gene transfer in prokaryotes.  
459 *Curr Opin Microbiol.* 2017;38: 16–21. doi:10.1016/j.mib.2017.03.012
- 460 16. Tran F, Boedicker JQ. Genetic cargo and bacterial species set the rate of vesicle-mediated  
461 horizontal gene transfer. *Sci Rep.* 2017;7: 8813. doi:10.1038/s41598-017-07447-7
- 462 17. Fulsundar S, Harms K, Flaten GE, Johnsen PJ, Chopade BA, Nielsen KM. Gene transfer  
463 potential of outer membrane vesicles of *Acinetobacter baylyi* and effects of stress on vesiculation. *Appl*  
464 *Environ Microbiol.* 2014;80: 3469–3483. doi:10.1128/AEM.04248-13
- 465 18. Wang S, Gao J, Wang Z. Outer membrane vesicles for vaccination and targeted drug delivery.

- 466 Wiley Interdiscip Rev Nanomed Nanobiotechnol. 2019;11: e1523. doi:10.1002/wnan.1523
- 467 19. Yoon H. Bacterial Outer Membrane Vesicles as a Delivery System for Virulence Regulation. J  
468 Microbiol Biotechnol. 2016;26: 1343–1347. doi:10.4014/jmb.1604.04080
- 469 20. Schwechheimer C, Kuehn MJ. Outer-membrane vesicles from Gram-negative bacteria:  
470 biogenesis and functions. Nat Rev Microbiol. 2015;13: 605–619. doi:10.1038/nrmicro3525
- 471 21. Turnbull L, Toyofuku M, Hynen AL, Kurosawa M, Pessi G, Petty NK, et al. Explosive cell  
472 lysis as a mechanism for the biogenesis of bacterial membrane vesicles and biofilms. Nat Commun.  
473 2016;7: 11220. doi:10.1038/ncomms11220
- 474 22. Cecil JD, Sirisaengtaksin N, O'Brien-Simpson NM, Krachler AM. Outer Membrane Vesicle-  
475 Host Cell Interactions. Microbiol Spectr. 2019;7. doi:10.1128/microbiolspec.PSIB-0001-2018
- 476 23. Caruana JC, Walper SA. Bacterial Membrane Vesicles as Mediators of Microbe - Microbe and  
477 Microbe - Host Community Interactions. Front Microbiol. 2020;11: 432.  
478 doi:10.3389/fmicb.2020.00432
- 479 24. Verhoeven AJ, Estrela JM, Meijer AJ. Alpha-adrenergic stimulation of glutamine metabolism  
480 in isolated rat hepatocytes. Biochem J. 1985;230: 457–463. doi:10.1042/bj2300457
- 481 25. Kolling GL, Matthews KR. Export of virulence genes and Shiga toxin by membrane vesicles  
482 of *Escherichia coli* O157:H7. Appl Environ Microbiol. 1999;65: 1843–1848.  
483 doi:10.1128/AEM.65.5.1843-1848.1999
- 484 26. Chatterjee S, Mondal A, Mitra S, Basu S. *Acinetobacter baumannii* transfers the blaNDM-1  
485 gene via outer membrane vesicles. J Antimicrob Chemother. 2017;72: 2201–2207.  
486 doi:10.1093/jac/dkx131
- 487 27. Blesa A, Berenguer J. Contribution of vesicle-protected extracellular DNA to horizontal gene  
488 transfer in *Thermus* spp. Int Microbiol. 2015;18: 177–187. doi:10.2436/20.1501.01.248
- 489 28. Ho M-H, Chen C-H, Goodwin JS, Wang B-Y, Xie H. Functional Advantages of  
490 *Porphyromonas gingivalis* Vesicles. PLoS One. 2015;10: e0123448. doi:10.1371/journal.pone.0123448
- 491 29. Yaron S, Kolling GL, Simon L, Matthews KR. Vesicle-mediated transfer of virulence genes  
492 from *Escherichia coli* O157:H7 to other enteric bacteria. Appl Environ Microbiol. 2000;66: 4414–4420.  
493 doi:10.1128/AEM.66.10.4414-4420.2000
- 494 30. Rumbo C, Fernández-Moreira E, Merino M, Poza M, Mendez JA, Soares NC, et al. Horizontal  
495 transfer of the OXA-24 carbapenemase gene via outer membrane vesicles: a new mechanism of  
496 dissemination of carbapenem resistance genes in *Acinetobacter baumannii*. Antimicrob Agents  
497 Chemother. 2011;55: 3084–3090. doi:10.1128/AAC.00929-10
- 498 31. Navon-Venezia S, Kondratyeva K, Carattoli A. *Klebsiella pneumoniae*: a major worldwide  
499 source and shuttle for antibiotic resistance. FEMS Microbiol Rev. 2017;41: 252–275.  
500 doi:10.1093/femsre/fux013
- 501 32. Lopes E, Saavedra MJ, Costa E, de Lencastre H, Poirel L, Aires-de-Sousa M. Epidemiology of  
502 carbapenemase-producing *Klebsiella pneumoniae* in northern Portugal: Predominance of KPC-2 and

- 503 OXA-48. *J Glob Antimicrob Resist.* 2020;22: 349–353. doi:10.1016/j.jgar.2020.04.007
- 504 33. Martora F, Pinto F, Folliero V, Cammarota M, Dell’Annunziata F, Squillaci G, et al. Isolation,  
505 characterization and analysis of pro-inflammatory potential of *Klebsiella pneumoniae* outer membrane  
506 vesicles. *Microbial Pathogenesis.* 2019;136: 103719. doi:10.1016/j.micpath.2019.103719
- 507 34. Lerner A, Matthias T, Aminov R. Potential Effects of Horizontal Gene Exchange in the Human  
508 Gut. *Front Immunol.* 2017;8: 1630. doi:10.3389/fimmu.2017.01630
- 509 35. Lerminiaux NA, Cameron ADS. Horizontal transfer of antibiotic resistance genes in clinical  
510 environments. *Can J Microbiol.* 2019;65: 34–44. doi:10.1139/cjm-2018-0275
- 511 36. Da Silva GJ, Domingues S. Insights on the Horizontal Gene Transfer of Carbapenemase  
512 Determinants in the Opportunistic Pathogen *Acinetobacter baumannii*. *Microorganisms.* 2016;4.  
513 doi:10.3390/microorganisms4030029
- 514 37. Ha JY, Choi S-Y, Lee JH, Hong S-H, Lee H-J. Delivery of Periodontopathogenic Extracellular  
515 Vesicles to Brain Monocytes and Microglial IL-6 Promotion by RNA Cargo. *Front Mol Biosci.* 2020;7:  
516 596366. doi:10.3389/fmolb.2020.596366
- 517 38. Pérez-Cruz C, Carrión O, Delgado L, Martínez G, López-Iglesias C, Mercade E. New type of  
518 outer membrane vesicle produced by the Gram-negative bacterium *Shewanella vesiculosa* M7T:  
519 implications for DNA content. *Appl Environ Microbiol.* 2013;79: 1874–1881.  
520 doi:10.1128/AEM.03657-12
- 521 39. Aminov RI. Horizontal gene exchange in environmental microbiota. *Front Microbiol.* 2011;2:  
522 158. doi:10.3389/fmicb.2011.00158
- 523 40. Chan W-T, Verma CS, Lane DP, Gan SK-E. A comparison and optimization of methods and  
524 factors affecting the transformation of *Escherichia coli*. *Biosci Rep.* 2013;33: e00086.  
525 doi:10.1042/BSR20130098
- 526 41. Higuchi-Takeuchi M, Morisaki K, Numata K. Method for the facile transformation of marine  
527 purple photosynthetic bacteria using chemically competent cells. *MicrobiologyOpen.* 2020;9.  
528 doi:10.1002/mbo3.953
- 529 42. De Lise F, Mensitieri F, Rusciano G, Dal Piaz F, Forte G, Di Lorenzo F, et al.  
530 *Novosphingobium* sp. PP1Y as a novel source of outer membrane vesicles. *J Microbiol.* 2019;57: 498–  
531 508. doi:10.1007/s12275-019-8483-2
- 532 43. Petrillo F, Pignataro D, Lavano MA, Santella B, Folliero V, Zannella C, et al. Current Evidence  
533 on the Ocular Surface Microbiota and Related Diseases. *Microorganisms.* 2020;8.  
534 doi:10.3390/microorganisms8071033
- 535
